# Supplementary material for: Cannabidiol Enhances Microglial Beta-Amyloid Peptide Phagocytosis and Clearance via Vanilloid Family Type 2 Channel Activation
Source: MDPI journal article supplement (doi:10.3390/ijms23105367), 2022-05-11
Supplement: s1 [file s1]

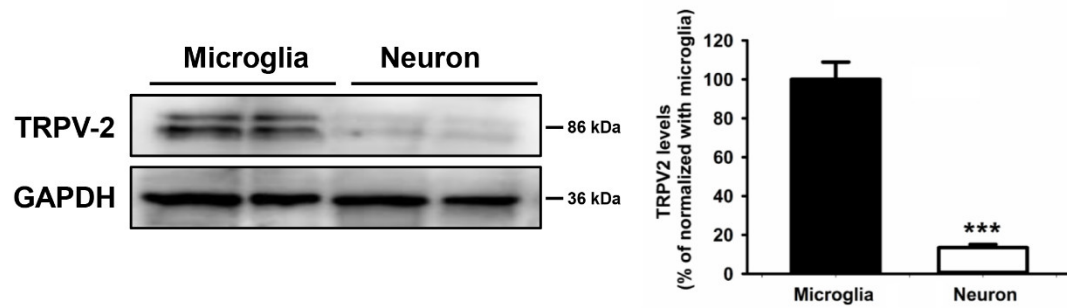

**Figure S1.** TRPV2 expression levels were different in neuron and microglia. (B) The protein expression levels of TRPV2 were measured on neuronal and microglial extracts. The data are represented as the mean  $\pm$  SEM ( $n = 3/\text{group}$ ). \*\*\*  $p < 0.001$  is compared to the neuron by the Student's t-test.

**A**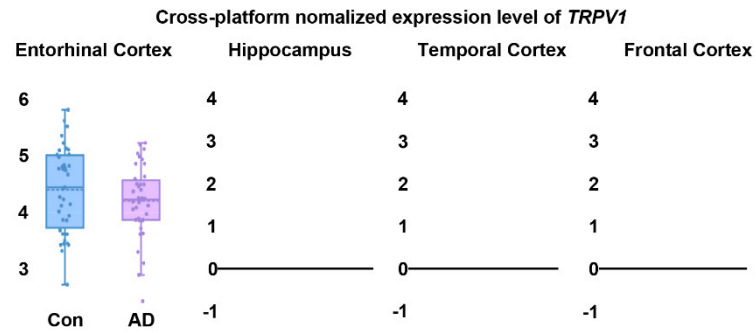**B**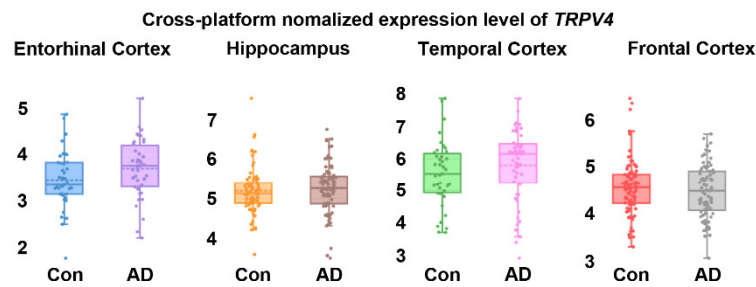**C**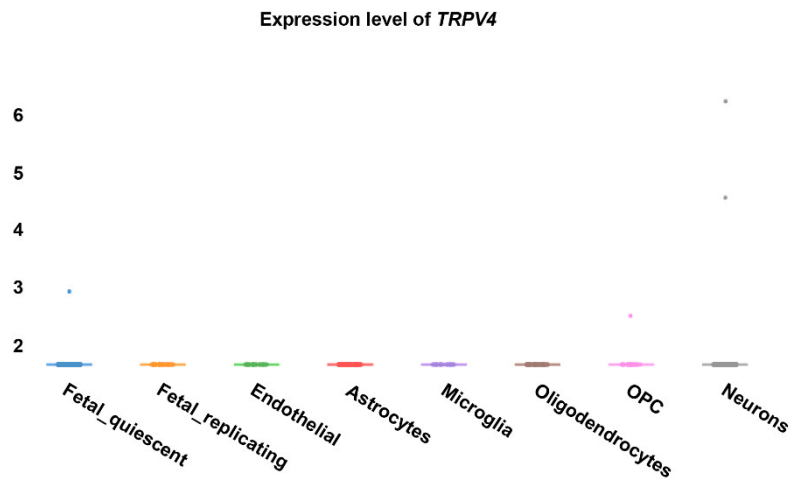

**Figure S2.** TRPV1 and TRPV4 expression levels in AD patients. (A) Transcriptional expression level of TRPV1 in entorhinal, temporal and frontal cortex and hippocampus tissues of patients with AD in the cross-platform database. (B) Transcriptional expression level of TRPV4 in entorhinal, temporal and frontal cortex and hippocampus tissues of patients with AD in the cross-platform database. (C) Transcriptional expression level of TRPV4 in different cells (endothelial, microglia, oligodendrocytes and neurons) were different in the GSE67835 database.

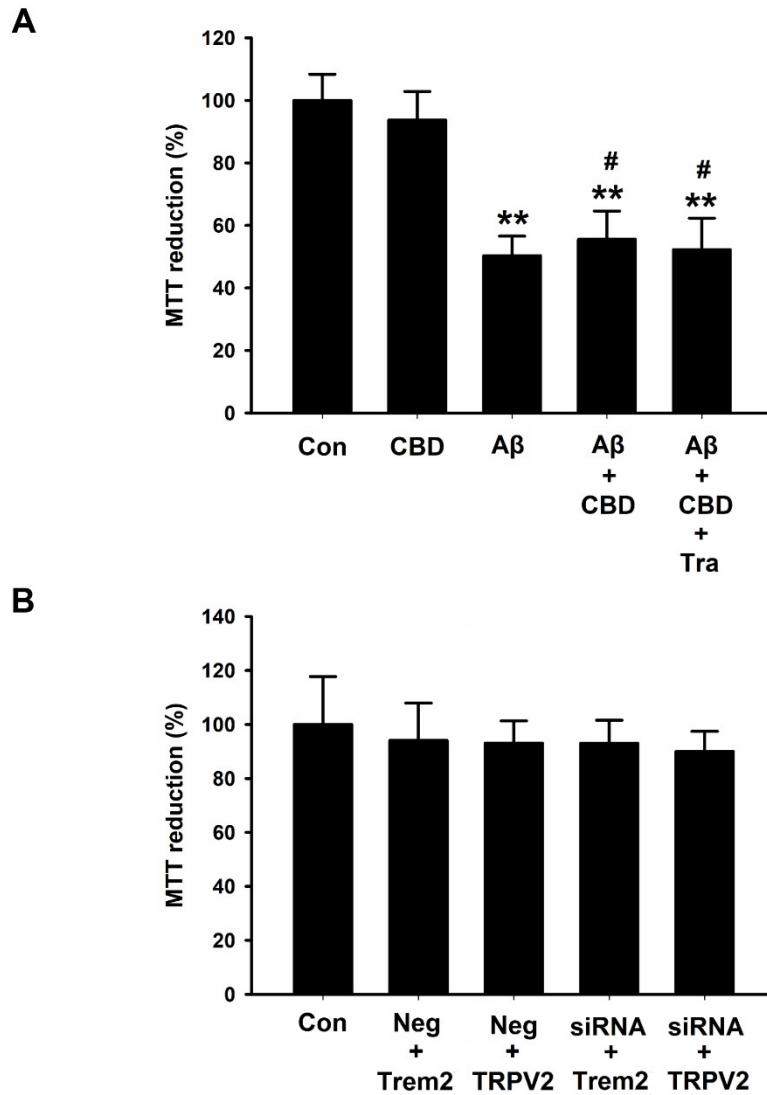

**Figure S3.** Microglial survival was different feature after siRNA and inhibitor. (A) BV2 microglia were pre-added with tra (tranilast 75  $\mu$ M), and treated with or without CBD after 24 hours ( $n = 12$ ), (B) BV2 microglia were treated with negative siRNA, TRPV2 and Trem2 siRNA ( $n = 6$ ), the cell viability was determined with the MTT reduction assay and was expressed as a percentage of the untreated cells. \*\*  $p < 0.01$  are compared to the control by the Tukey's test; #  $p < 0.05$  is compared to A $\beta$  group by the Tukey's test.

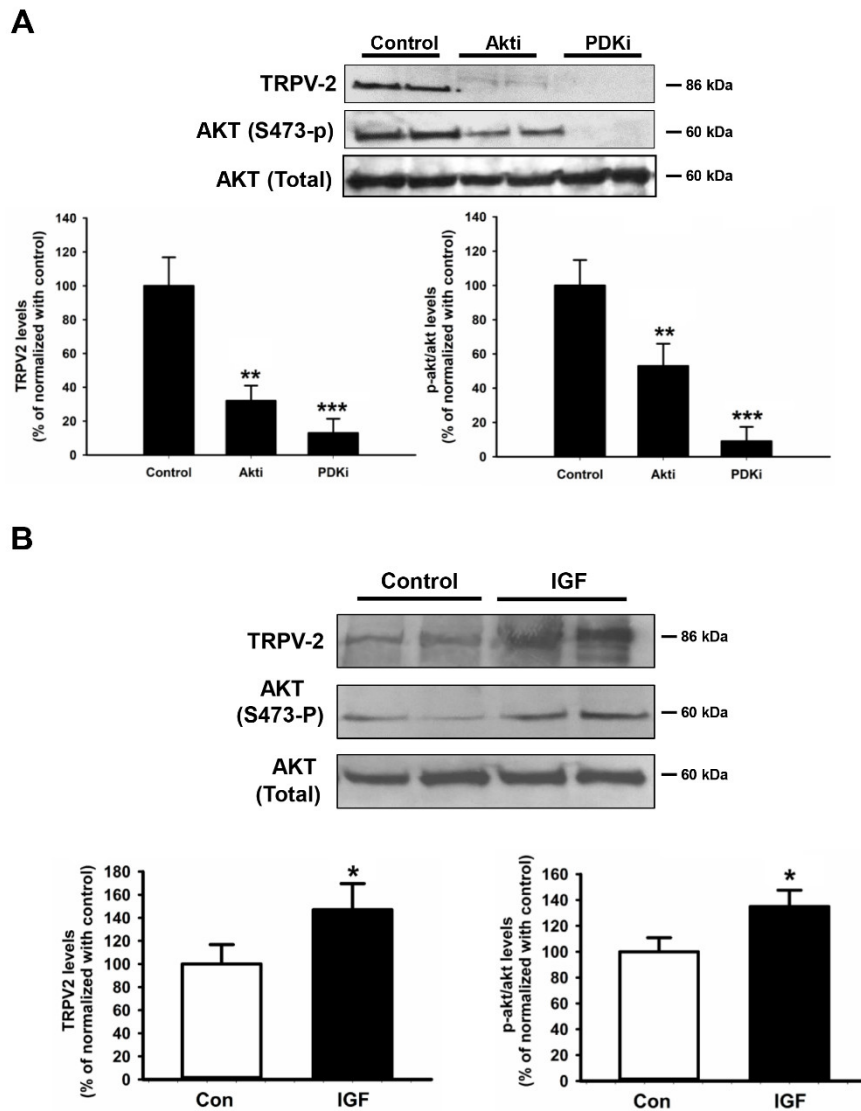

**Figure S4.** TRPV2 protein expression was changed following PI3K/Akt signaling pathway. (A) BV2 microglia were treated with akti (Akt inhibitor 10  $\mu$ M), PDK1i (PDK1 inhibitor: GSK2334470 1 $\mu$ M) after 24 hours. (B) N2a cells were treated with IGF-1 (50 ng/ml) after 4 hours, the TRPV2 protein levels and the phosphorylation of Akt were determined by western blot. Band densitometry quantification of TRPV2 and the phosphorylation of Akt were normalized to total Akt levels. The data are represented as the mean  $\pm$  SEM (n=4). \*  $p < 0.05$ , \*\*  $p < 0.01$  and \*\*\*  $p < 0.001$  are compared to control by the Tukey's test.

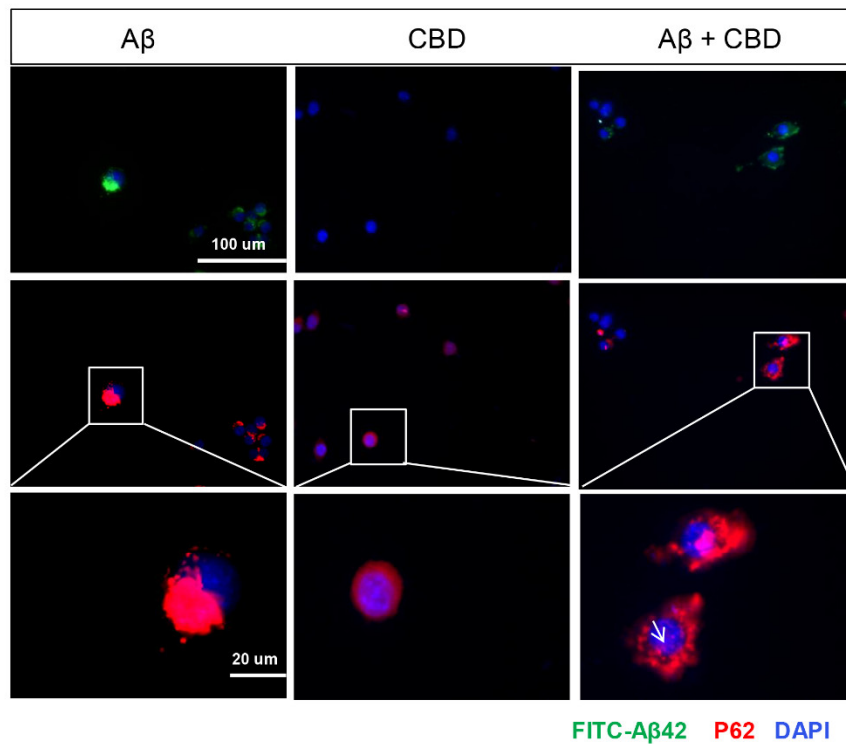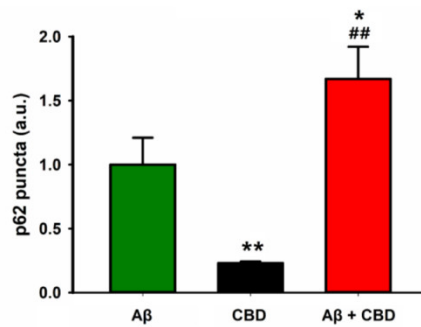

**Figure S5.** CBD induced p62 expression in microglial cells. After the primary microglia were treated with Aβ for 24 hours, representative immunofluorescence staining of the p62 in each group were observed in the sections (arrows in the images denote the p62). The intensity of the signals was quantified and expressed as a percentage of the controls using ImageJ software (n = 30 to 46 per group). a.u., arbitrary units. The data are represented as the mean ± SEM. \* p < 0.05, and \*\* p < 0.01 are compared to the controls by the Tukey's test.

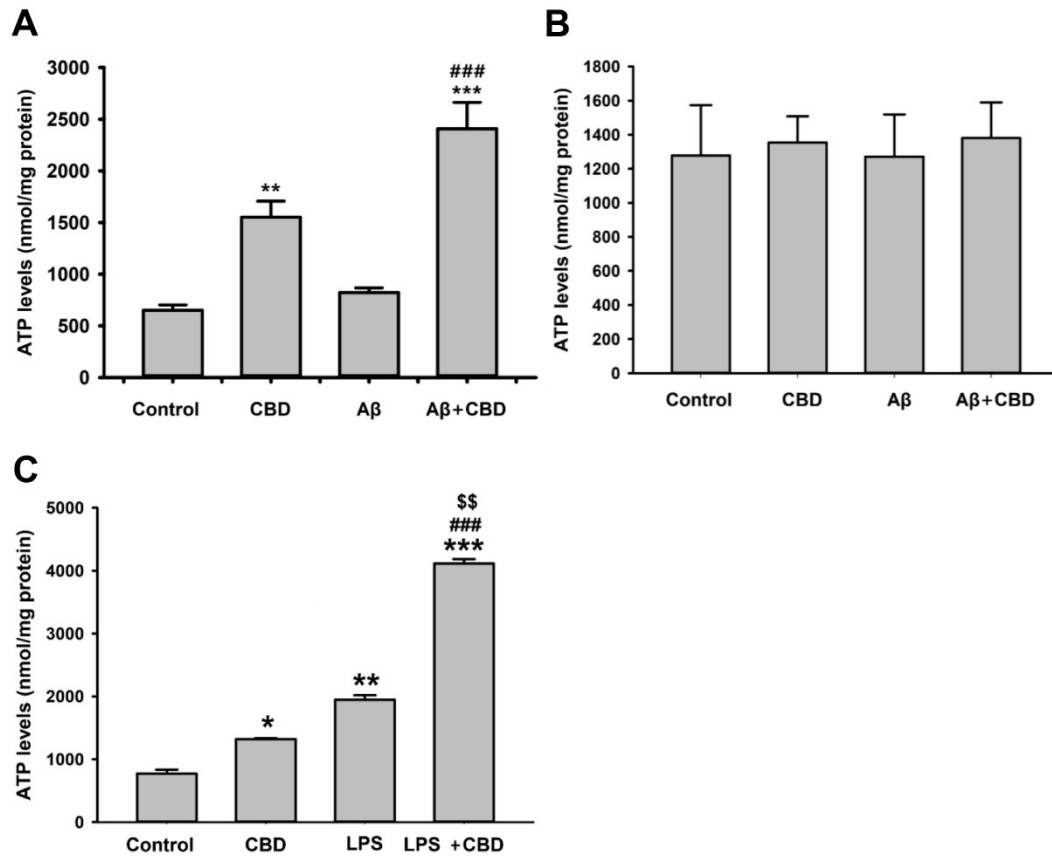

**Figure S6.** Total ATP production of BV2 and N2a cells under different conditions. (A) N2a cells were cultured at  $1 \times 10^5$  on poly-D-lysine in 6-well plates with MEM medium, and after 24 hours, half of medium was removed. BV2 cells were plated at  $1 \times 10^5$  with DMEM complete medium, and after 24 hours, the co-cultured cells were treated with  $1 \mu\text{g/ml}$  FITC-A $\beta$ 42, CBD ( $10 \mu\text{M}$ ) was added to medium for 24 hours. (B) Total ATP production of N2a cells under different conditions as indicated. A $\beta$  and/or CBD were added to the cells for 24 hours before measurement. (C) Total ATP production of BV2 cells under different conditions as indicated. LPS ( $1 \mu\text{g/ml}$ ) and/or CBD were added to the cells for 24 hours before measurement. The data are represented as the mean  $\pm$  SEM (n=4). \*  $p < 0.05$ , \*\*  $p < 0.01$  and \*\*\*  $p < 0.001$  are compared to the controls by the Tukey's test; ###  $p < 0.001$  is between CBD and CBD + A $\beta$  by the Student's t-test; \$\$  $p < 0.01$  is between A $\beta$  and CBD + A $\beta$  by the Student's t-test.

**Table S1.** Cannabidiol enhances microglial beta-amyloid peptides

phagocytosis and clearance via vanilloid family type 2 channel activation.

| Figure  | Statistical analysis                                  | Number of observations | T or F values                                                                                    | VS                                                                                                                                                                            | P values                                                                |
|---------|-------------------------------------------------------|------------------------|--------------------------------------------------------------------------------------------------|-------------------------------------------------------------------------------------------------------------------------------------------------------------------------------|-------------------------------------------------------------------------|
| Fig. 1A | One-way ANOVA with Tukey's <i>post hoc</i> test       | 4                      | $F(5, 32) = 7.475$                                                                               | E15 vs. E17<br>E15 vs. P1<br>E15 vs. P3<br>E15 vs. M4<br>E15 vs. M6                                                                                                           | $P = 0.988$<br>$P = 0.206$<br>$P = 0.024$<br>$P = 0.012$<br>$P = 0.001$ |
| Fig. 1B | Unpaired, two-tailed student's <i>t</i> test analysis | 4                      | $t(6) = 2.916$<br>$t(6) = 4.432$                                                                 | CX: WT vs. APP<br>HP: WT vs. APP                                                                                                                                              | $P = 0.027$<br>$P = 0.004$                                              |
| Fig. 1C | Date from AlzData web server (www.alzdata.org)        | 19                     |                                                                                                  | EC: Con vs. AD<br>HP: Con vs. AD<br>TC: Con vs. AD<br>FC: Con vs. AD                                                                                                          | $P = 0.035$<br>$P = 0.181$<br>$P = 0.22$<br>$P = 0.067$                 |
| Fig. 1D | Date from AlzData web server (www.alzdata.org)        | 19                     |                                                                                                  | EC: Con vs. AD                                                                                                                                                                | $P = 0.055$                                                             |
| Fig. 1E | Date from AlzData web server (www.alzdata.org)        | 19                     |                                                                                                  | HP: Con vs. AD                                                                                                                                                                | $P = 0.017$                                                             |
| Fig. 2B | One-way ANOVA with Tukey's <i>post hoc</i> test       | 4                      | $F(2, 9) = 35.622$                                                                               | $A\beta$ vs. CBD<br>$A\beta$ vs. CBD + $A\beta$<br>CBD vs. CBD + $A\beta$                                                                                                     | $P = 0.004$<br>$P = 0.011$<br>$P < 0.001$                               |
| Fig. 2C | Unpaired, two-tailed student's <i>t</i> test analysis | 3                      | $t(10) = -1.812$<br>$t(10) = -2.721$<br>$t(10) = -2.828$<br>$t(10) = -3.003$<br>$t(10) = -3.841$ | 1h: $A\beta$ vs. $A\beta$ + CBD<br>3h: $A\beta$ vs. $A\beta$ + CBD<br>6h: $A\beta$ vs. $A\beta$ + CBD<br>16h: $A\beta$ vs. $A\beta$ + CBD<br>24h: $A\beta$ vs. $A\beta$ + CBD | $P = 0.11$<br>$P = 0.022$<br>$P = 0.018$<br>$P = 0.013$<br>$P = 0.003$  |
| Fig.    | Unpaired,                                             | 4                      | $t(6) = 5.365$                                                                                   | Sup: $A\beta$ vs. $A\beta$ +                                                                                                                                                  | $P = 0.002$                                                             |

|         |                                                 |   |                     |                                                                                                                                                                                                           |                                                                                                        |
|---------|-------------------------------------------------|---|---------------------|-----------------------------------------------------------------------------------------------------------------------------------------------------------------------------------------------------------|--------------------------------------------------------------------------------------------------------|
| 2E      | two-tailed student's <i>t</i> test analysis     |   | $t(6) = -2.87$      | CBD<br>Lys: A $\beta$ vs. A $\beta$ + CBD                                                                                                                                                                 | $P = 0.028$                                                                                            |
| Fig. 3A | One-way ANOVA with Tukey's <i>post hoc</i> test | 6 | $F(4, 25) = 23.792$ | Con vs. A $\beta$<br>Con vs. A $\beta$ + CBD<br>Con vs. A $\beta$ + 2-PAB<br>Con vs. A $\beta$ + CAP<br>A $\beta$ vs. A $\beta$ + CBD<br>A $\beta$ vs. A $\beta$ + 2-PAB<br>A $\beta$ vs. A $\beta$ + CAP | $P = 0.001$<br>$P < 0.001$<br>$P < 0.001$<br>$P = 0.003$<br>$P = 0.002$<br>$P = 0.013$<br>$P = 0.0045$ |
| Fig. 3B | One-way ANOVA with Tukey's <i>post hoc</i> test | 6 | $F(3, 20) = 5.118$  | WT + A $\beta$ vs. A $\beta$ + CBD<br>siRNA + A $\beta$ vs. siRNA + A $\beta$ + CBD<br>WT + A $\beta$ + CBD vs. siRNA + A $\beta$<br>WT + A $\beta$ + CBD vs. siRNA + A $\beta$ + CBD                     | $P = 0.045$<br>$P = 0.981$<br>$P = 0.011$<br>$P = 0.026$                                               |
| Fig. 3C | One-way ANOVA with Tukey's <i>post hoc</i> test | 6 | $F(3, 20) = 26.223$ | Con vs. A $\beta$<br>Con vs. A $\beta$ + CBD<br>Con vs. A $\beta$ + CBD + Tra<br>A $\beta$ vs. A $\beta$ + CBD<br>A $\beta$ + CBD vs. A $\beta$ + CBD + Tra                                               | $P = 0.002$<br>$P < 0.001$<br>$P = 0.003$<br>$P = 0.004$<br>$P = 0.001$                                |
| Fig. 3D | One-way ANOVA with Tukey's <i>post hoc</i> test | 6 | $F(3, 20) = 16.863$ | Con vs. A $\beta$<br>Con vs. A $\beta$ + CBD<br>Con vs. A $\beta$ + CBD + Akti<br>A $\beta$ vs. A $\beta$ + CBD<br>A $\beta$ + CBD vs. A $\beta$ + CBD + Akti                                             | $P = 0.002$<br>$P < 0.001$<br>$P = 0.004$<br>$P = 0.004$<br>$P = 0.01$                                 |
| Fig. 3E | One-way ANOVA with Tukey's <i>post hoc</i> test | 6 | $F(3, 20) = 38.978$ | Con vs. A $\beta$<br>Con vs. A $\beta$ + CBD<br>Con vs. A $\beta$ + CBD + PDK1i<br>A $\beta$ vs. A $\beta$ + CBD<br>A $\beta$ + CBD vs. A $\beta$ + CBD + PDK1i                                           | $P = 0.002$<br>$P < 0.001$<br>$P = 0.001$<br>$P = 0.004$<br>$P < 0.001$                                |
| Fig. 3F | One-way ANOVA with Tukey's                      | 6 | $F(3, 20) = 25.018$ | Con vs. A $\beta$<br>Con vs. A $\beta$ + CBD<br>Con vs. A $\beta$ + CBD + PERKi                                                                                                                           | $P = 0.002$<br>$P < 0.001$<br>$P = 0.003$                                                              |



|                        |                                                             |   |                      |                                                                                              |                                                          |
|------------------------|-------------------------------------------------------------|---|----------------------|----------------------------------------------------------------------------------------------|----------------------------------------------------------|
|                        | <i>post hoc</i> test                                        |   |                      | A $\beta$ vs. A $\beta$ + CBD<br>A $\beta$ + CBD vs. A $\beta$ +<br>CBD + PERKi              | $P = 0.004$<br>$P = 0.002$                               |
| Fig. 4<br>TRPV<br>2    | One-way<br>ANOVA<br>with<br>Tukey's<br><i>post hoc</i> test | 6 | F(3, 20) =<br>12.335 | Con vs. CBD<br>Con vs. A $\beta$<br>Con vs. A $\beta$ + CBD<br>A $\beta$ vs. A $\beta$ + CBD | $P = 0.013$<br>$P = 0.991$<br>$P = 0.002$<br>$P = 0.001$ |
| Fig. 4<br>Trem2        | One-way<br>ANOVA<br>with<br>Tukey's<br><i>post hoc</i> test | 6 | F(3, 20) =<br>67.094 | Con vs. CBD<br>Con vs. A $\beta$<br>Con vs. A $\beta$ + CBD<br>A $\beta$ vs. A $\beta$ + CBD | $P = 0.008$<br>$P = 0.005$<br>$P < 0.001$<br>$P = 0.001$ |
| Fig. 4<br>Iba1         | One-way<br>ANOVA<br>with<br>Tukey's<br><i>post hoc</i> test | 6 | F(3, 20) =<br>56.861 | Con vs. CBD<br>Con vs. A $\beta$<br>Con vs. A $\beta$ + CBD<br>A $\beta$ vs. A $\beta$ + CBD | $P = 1.000$<br>$P < 0.001$<br>$P < 0.001$<br>$P = 0.002$ |
| Fig. 4<br>IL-1 $\beta$ | One-way<br>ANOVA<br>with<br>Tukey's<br><i>post hoc</i> test | 6 | F(3, 20) =<br>8.753  | Con vs. CBD<br>Con vs. A $\beta$<br>Con vs. A $\beta$ + CBD<br>A $\beta$ vs. A $\beta$ + CBD | $P = 0.773$<br>$P = 0.001$<br>$P = 0.04$<br>$P = 0.004$  |
| Fig. 4<br>IL-6         | One-way<br>ANOVA<br>with<br>Tukey's<br><i>post hoc</i> test | 6 | F(3, 20) =<br>16.541 | Con vs. CBD<br>Con vs. A $\beta$<br>Con vs. A $\beta$ + CBD<br>A $\beta$ vs. A $\beta$ + CBD | $P = 0.036$<br>$P = 0.321$<br>$P = 0.005$<br>$P = 0.012$ |
| Fig. 4<br>IL-4         | One-way<br>ANOVA<br>with<br>Tukey's<br><i>post hoc</i> test | 6 | F(3, 20) =<br>57.448 | Con vs. CBD<br>Con vs. A $\beta$<br>Con vs. A $\beta$ + CBD<br>A $\beta$ vs. A $\beta$ + CBD | $P = 0.124$<br>$P < 0.001$<br>$P < 0.001$<br>$P = 0.02$  |
| Fig. 4<br>GPR3<br>4    | One-way<br>ANOVA<br>with<br>Tukey's<br><i>post hoc</i> test | 6 | F(3, 20) =<br>64.956 | Con vs. CBD<br>Con vs. A $\beta$<br>Con vs. A $\beta$ + CBD<br>A $\beta$ vs. A $\beta$ + CBD | $P = 0.052$<br>$P < 0.001$<br>$P < 0.001$<br>$P = 0.002$ |
| Fig. 4<br>CR3          | One-way<br>ANOVA<br>with<br>Tukey's<br><i>post hoc</i> test | 6 | F(3, 20) =<br>2.018  | Con vs. CBD<br>Con vs. A $\beta$<br>Con vs. A $\beta$ + CBD<br>A $\beta$ vs. A $\beta$ + CBD | $P = 0.332$<br>$P = 0.267$<br>$P = 0.04$<br>$P = 0.872$  |

|                     |                                                             |   |                     |                                                                                                                                                                                                                                                   |                                                                         |
|---------------------|-------------------------------------------------------------|---|---------------------|---------------------------------------------------------------------------------------------------------------------------------------------------------------------------------------------------------------------------------------------------|-------------------------------------------------------------------------|
| Fig.4<br>P2Y6       | One-way<br>ANOVA<br>with<br>Tukey's<br><i>post hoc</i> test | 6 | $F(3, 20) = 5.618$  | Con vs. CBD<br>Con vs. A $\beta$<br>Con vs. A $\beta$ + CBD<br>A $\beta$ vs. A $\beta$ + CBD                                                                                                                                                      | $P = 0.032$<br>$P = 0.042$<br>$P = 0.014$<br>$P = 0.027$                |
| Fig. 5<br>TRPV<br>2 | One-way<br>ANOVA<br>with<br>Tukey's<br><i>post hoc</i> test | 4 | $F(3, 8) = 56.861$  | WT + A $\beta$ vs. WT +<br>A $\beta$ + CBD<br>WT + A $\beta$ vs. siRNA<br>+ A $\beta$<br>WT + A $\beta$ vs. siRNA<br>+ A $\beta$ + CBD<br>WT + A $\beta$ + CBD vs.<br>siRNA + CBD + A $\beta$<br>siRNA + A $\beta$ vs.<br>siRNA + A $\beta$ + CBD | $P < 0.001$<br>$P = 0.001$<br>$P = 0.435$<br>$P < 0.001$<br>$P = 0.042$ |
| Fig. 5<br>Trem2     | One-way<br>ANOVA<br>with<br>Tukey's<br><i>post hoc</i> test | 4 | $F(3, 8) = 53.818$  | WT + A $\beta$ vs. WT +<br>A $\beta$ + CBD<br>WT + A $\beta$ vs. siRNA<br>+ A $\beta$<br>WT + A $\beta$ vs. siRNA<br>+ A $\beta$ + CBD<br>WT + A $\beta$ + CBD vs.<br>siRNA + CBD + A $\beta$<br>siRNA + A $\beta$ vs.<br>siRNA + A $\beta$ + CBD | $P < 0.001$<br>$P = 0.001$<br>$P = 0.014$<br>$P < 0.001$<br>$P = 0.018$ |
| Fig. 5<br>P2Y6      | One-way<br>ANOVA<br>with<br>Tukey's<br><i>post hoc</i> test | 4 | $F(3, 8) = 12.986$  | WT + A $\beta$ vs. WT +<br>A $\beta$ + CBD<br>WT + A $\beta$ vs. siRNA<br>+ A $\beta$<br>WT + A $\beta$ vs. siRNA<br>+ A $\beta$ + CBD<br>WT + A $\beta$ + CBD vs.<br>siRNA + CBD + A $\beta$<br>siRNA + A $\beta$ vs.<br>siRNA + A $\beta$ + CBD | $P = 0.038$<br>$P = 0.003$<br>$P = 0.011$<br>$P = 0.826$<br>$P = 0.014$ |
| Fig. 5<br>Iba1      | One-way<br>ANOVA<br>with<br>Tukey's<br><i>post hoc</i> test | 4 | $F(3, 8) = 193.709$ | WT + A $\beta$ vs. WT +<br>A $\beta$ + CBD<br>WT + A $\beta$ vs. siRNA<br>+ A $\beta$<br>WT + A $\beta$ vs. siRNA<br>+ A $\beta$ + CBD<br>WT + A $\beta$ + CBD vs.<br>siRNA + CBD + A $\beta$<br>siRNA + A $\beta$ vs.                            | $P < 0.001$<br>$P < 0.001$<br>$P < 0.001$<br>$P = 0.013$<br>$P = 0.008$ |

|                     |                                                             |   |                     |                                                                                                                                                                                                                                                   |                                                               |
|---------------------|-------------------------------------------------------------|---|---------------------|---------------------------------------------------------------------------------------------------------------------------------------------------------------------------------------------------------------------------------------------------|---------------------------------------------------------------|
|                     |                                                             |   |                     | siRNA + A $\beta$ + CBD                                                                                                                                                                                                                           |                                                               |
| Fig. 5<br>IL-4      | One-way<br>ANOVA<br>with<br>Tukey's<br><i>post hoc</i> test | 4 | F(3, 8) =<br>12.221 | WT + A $\beta$ vs. WT +<br>A $\beta$ + CBD<br>WT + A $\beta$ vs. siRNA<br>+ A $\beta$<br>WT + A $\beta$ vs. siRNA<br>+ A $\beta$ + CBD<br>WT + A $\beta$ + CBD vs.<br>siRNA+ CBD + A $\beta$<br>siRNA + A $\beta$ vs.<br>siRNA + A $\beta$ + CBD  | P = 0.028<br>P = 0.013<br>P = 0.031<br>P = 0.467<br>P = 0.039 |
| Fig. 5<br>GPR3<br>4 | One-way<br>ANOVA<br>with<br>Tukey's<br><i>post hoc</i> test | 4 | F(3, 8) =<br>45.404 | WT + A $\beta$ vs. WT +<br>A $\beta$ + CBD<br>WT + A $\beta$ vs. siRNA<br>+ A $\beta$<br>WT + A $\beta$ vs. siRNA<br>+ A $\beta$ + CBD<br>WT + A $\beta$ + CBD vs.<br>siRNA + CBD + A $\beta$<br>siRNA + A $\beta$ vs.<br>siRNA + A $\beta$ + CBD | P < 0.001<br>P = 0.008<br>P = 0.411<br>P < 0.001<br>P = 0.014 |
| Fig.5<br>CR3        | One-way<br>ANOVA<br>with<br>Tukey's<br><i>post hoc</i> test | 4 | F(3, 8) = 0.721     | WT + A $\beta$ vs. WT +<br>A $\beta$ + CBD<br>WT + A $\beta$ vs. siRNA<br>+ A $\beta$<br>WT + A $\beta$ vs. siRNA<br>+ A $\beta$ + CBD<br>WT + A $\beta$ + CBD vs.<br>siRNA+ CBD + A $\beta$<br>siRNA + A $\beta$ vs.<br>siRNA + A $\beta$ + CBD  | P = 0.032<br>P = 0.976<br>P = 1.00<br>P = 0.026<br>P = 1.00   |
| Fig. 6<br>TRPV<br>2 | One-way<br>ANOVA<br>with<br>Tukey's<br><i>post hoc</i> test | 4 | F(3, 8) =<br>49.106 | WT + A $\beta$ vs. WT +<br>A $\beta$ + CBD<br>WT + A $\beta$ vs. siRNA<br>+ A $\beta$<br>WT + A $\beta$ vs. siRNA<br>+ A $\beta$ + CBD<br>WT + A $\beta$ + CBD vs.<br>siRNA+ CBD + A $\beta$<br>siRNA + A $\beta$ vs.<br>siRNA + A $\beta$ + CBD  | P = 0.034<br>P = 0.041<br>P < 0.001<br>P < 0.001<br>P < 0.001 |
| Fig. 6<br>Trem2     | One-way<br>ANOVA<br>with                                    | 4 | F(3, 8) =<br>33.831 | WT + A $\beta$ vs. WT +<br>A $\beta$ + CBD<br>WT + A $\beta$ vs. siRNA                                                                                                                                                                            | P = 0.001<br>P = 0.024                                        |

|                     |                                                             |   |                     |                                                                                                                                                                                                                                                   |                                                                         |
|---------------------|-------------------------------------------------------------|---|---------------------|---------------------------------------------------------------------------------------------------------------------------------------------------------------------------------------------------------------------------------------------------|-------------------------------------------------------------------------|
|                     | Tukey's<br><i>post hoc</i> test                             |   |                     | + A $\beta$<br>WT + A $\beta$ vs. siRNA<br>+ A $\beta$ + CBD<br>WT + A $\beta$ + CBD vs.<br>siRNA+ CBD + A $\beta$<br>siRNA + A $\beta$ vs.<br>siRNA + A $\beta$ + CBD                                                                            | $P = 0.674$<br>$P = 0.004$<br>$P = 0.005$                               |
| Fig. 6<br>P2Y6      | One-way<br>ANOVA<br>with<br>Tukey's<br><i>post hoc</i> test | 4 | F(3, 8) =<br>51.478 | WT + A $\beta$ vs. WT +<br>A $\beta$ + CBD<br>WT + A $\beta$ vs. siRNA<br>+ A $\beta$<br>WT + A $\beta$ vs. siRNA<br>+ A $\beta$ + CBD<br>WT + A $\beta$ + CBD vs.<br>siRNA+ CBD + A $\beta$<br>siRNA + A $\beta$ vs.<br>siRNA + A $\beta$ + CBD  | $P < 0.001$<br>$P < 0.001$<br>$P < 0.001$<br>$P = 0.025$<br>$P = 0.092$ |
| Fig. 6<br>Iba1      | One-way<br>ANOVA<br>with<br>Tukey's<br><i>post hoc</i> test | 4 | F(3, 8) = 27.53     | WT + A $\beta$ vs. WT +<br>A $\beta$ + CBD<br>WT + A $\beta$ vs. siRNA<br>+ A $\beta$<br>WT + A $\beta$ vs. siRNA<br>+ A $\beta$ + CBD<br>WT + A $\beta$ + CBD vs.<br>siRNA + CBD + A $\beta$<br>siRNA + A $\beta$ vs.<br>siRNA + A $\beta$ + CBD | $P = 0.002$<br>$P = 0.022$<br>$P = 0.18$<br>$P < 0.001$<br>$P = 0.001$  |
| Fig. 6<br>IL-4      | One-way<br>ANOVA<br>with<br>Tukey's<br><i>post hoc</i> test | 4 | F(3, 8) = 5.118     | WT + A $\beta$ vs. WT +<br>A $\beta$ + CBD<br>WT + A $\beta$ vs. siRNA<br>+ A $\beta$<br>WT + A $\beta$ vs. siRNA<br>+ A $\beta$ + CBD<br>WT + A $\beta$ + CBD vs.<br>siRNA+ CBD + A $\beta$<br>siRNA + A $\beta$ vs.<br>siRNA + A $\beta$ + CBD  | $P = 0.554$<br>$P = 0.023$<br>$P = 0.004$<br>$P = 0.007$<br>$P < 0.001$ |
| Fig. 6<br>GPR3<br>4 | One-way<br>ANOVA<br>with<br>Tukey's<br><i>post hoc</i> test | 4 | F(3, 8) = 55.54     | WT + A $\beta$ vs. WT +<br>A $\beta$ + CBD<br>WT + A $\beta$ vs. siRNA<br>+ A $\beta$<br>WT + A $\beta$ vs. siRNA<br>+ A $\beta$ + CBD<br>WT + A $\beta$ + CBD vs.                                                                                | $P < 0.001$<br>$P = 0.183$<br>$P = 0.732$<br>$P < 0.001$                |

|                                   |                                                             |   |                        |                                                                                                                                                                                                                                                   |                                                                         |
|-----------------------------------|-------------------------------------------------------------|---|------------------------|---------------------------------------------------------------------------------------------------------------------------------------------------------------------------------------------------------------------------------------------------|-------------------------------------------------------------------------|
|                                   |                                                             |   |                        | siRNA+ CBD + A $\beta$<br>siRNA + A $\beta$ vs.<br>siRNA + A $\beta$ + CBD                                                                                                                                                                        | $P = 0.043$                                                             |
| Fig. 6<br>CR3                     | One-way<br>ANOVA<br>with<br>Tukey's<br><i>post hoc</i> test | 4 | $F(3, 8) = 3.754$      | WT + A $\beta$ vs. WT +<br>A $\beta$ + CBD<br>WT + A $\beta$ vs. siRNA<br>+ A $\beta$<br>WT + A $\beta$ vs. siRNA<br>+ A $\beta$ + CBD<br>WT + A $\beta$ + CBD vs.<br>siRNA + CBD + A $\beta$<br>siRNA + A $\beta$ vs.<br>siRNA + A $\beta$ + CBD | $P = 0.814$<br>$P = 0.025$<br>$P = 0.045$<br>$P = 0.309$<br>$P = 0.331$ |
| Fig.<br>7A<br>TRPV<br>2           | One-way<br>ANOVA<br>with<br>Tukey's<br><i>post hoc</i> test | 4 | $F(5, 18) =$<br>37.405 | 0h vs. 1h<br>0h vs. 3h<br>0h vs. 6h<br>0h vs. 16h<br>0h vs. 24h                                                                                                                                                                                   | $P = 0.033$<br>$P = 0.026$<br>$P = 0.004$<br>$P < 0.001$<br>$P = 0.007$ |
| Fig.<br>7A<br>pAkt/<br>Akt        | One-way<br>ANOVA<br>with<br>Tukey's<br><i>post hoc</i> test | 4 | $F(5, 18) =$<br>26.784 | 0h vs. 1h<br>0h vs. 3h<br>0h vs. 6h<br>0h vs. 16h<br>0h vs. 24h                                                                                                                                                                                   | $P = 0.016$<br>$P = 1.00$<br>$P = 0.002$<br>$P < 0.001$<br>$P = 0.001$  |
| Fig.<br>7A<br>LC3-<br>B/LC3<br>-A | One-way<br>ANOVA<br>with<br>Tukey's<br><i>post hoc</i> test | 4 | $F(5, 18) =$<br>18.745 | 0h vs. 1h<br>0h vs. 3h<br>0h vs. 6h<br>0h vs. 16h<br>0h vs. 24h                                                                                                                                                                                   | $P = 0.038$<br>$P = 0.008$<br>$P = 0.034$<br>$P = 0.004$<br>$P < 0.001$ |
| Fig.<br>7A<br>P62                 | One-way<br>ANOVA<br>with<br>Tukey's<br><i>post hoc</i> test | 4 | $F(5, 18) =$<br>12.929 | 0h vs. 1h<br>0h vs. 3h<br>0h vs. 6h<br>0h vs. 16h<br>0h vs. 24h                                                                                                                                                                                   | $P = 0.969$<br>$P = 0.01$<br>$P = 0.887$<br>$P = 0.031$<br>$P = 0.01$   |
| Fig.<br>7A<br>Beclin<br>e-1       | One-way<br>ANOVA<br>with<br>Tukey's<br><i>post hoc</i> test | 4 | $F(5, 18) =$<br>17.626 | 0h vs. 1h<br>0h vs. 3h<br>0h vs. 6h<br>0h vs. 16h<br>0h vs. 24h                                                                                                                                                                                   | $P = 0.036$<br>$P = 0.028$<br>$P = 0.006$<br>$P = 0.029$<br>$P = 0.031$ |
| Fig.                              | One-way                                                     | 4 | $F(2, 9) = 7.59$       | Con vs. A $\beta$ + CBD                                                                                                                                                                                                                           | $P = 0.028$                                                             |

|                             |                                                             |   |                        |                                                                                                                                                                                                                                                   |                                                                         |
|-----------------------------|-------------------------------------------------------------|---|------------------------|---------------------------------------------------------------------------------------------------------------------------------------------------------------------------------------------------------------------------------------------------|-------------------------------------------------------------------------|
| 7B<br>TRPV<br>2             | ANOVA<br>with<br>Tukey's<br><i>post hoc</i> test            |   |                        | A $\beta$ + CBD vs. A $\beta$ +<br>CBD + Tra                                                                                                                                                                                                      | $P = 0.047$                                                             |
| Fig.<br>7B<br>pAkt/<br>Akt  | One-way<br>ANOVA<br>with<br>Tukey's<br><i>post hoc</i> test | 4 | F(2, 9) =<br>11.461    | Con vs. A $\beta$ + CBD<br>A $\beta$ + CBD vs. A $\beta$ +<br>CBD + Tra                                                                                                                                                                           | $P = 0.035$<br>$P = 0.011$                                              |
| Fig.<br>7B<br>LC3B/<br>LC3A | One-way<br>ANOVA<br>with<br>Tukey's<br><i>post hoc</i> test | 4 | F(2, 9) = 5.471        | Con vs. A $\beta$ + CBD<br>A $\beta$ + CBD vs. A $\beta$ +<br>CBD + Tra                                                                                                                                                                           | $P = 0.018$<br>$P = 0.069$                                              |
| Fig.<br>7B<br>P62           | One-way<br>ANOVA<br>with<br>Tukey's<br><i>post hoc</i> test | 4 | F(2, 9) =<br>12.617    | Con vs. A $\beta$ + CBD<br>A $\beta$ + CBD vs. A $\beta$ +<br>CBD + Tra                                                                                                                                                                           | $P = 0.024$<br>$P = 0.018$                                              |
| Fig.<br>7B<br>Beclin<br>e-1 | One-way<br>ANOVA<br>with<br>Tukey's<br><i>post hoc</i> test | 4 | F(2, 9) =<br>14.512    | Con vs. A $\beta$ + CBD<br>A $\beta$ + CBD vs. A $\beta$ +<br>CBD + Tra                                                                                                                                                                           | $P = 0.021$<br>$P = 0.012$                                              |
| Fig.8<br>A                  | One-way<br>ANOVA<br>with<br>Tukey's<br><i>post hoc</i> test | 6 | F(3, 20) =<br>1612.792 | Con vs. CBD<br>Con vs. A $\beta$<br>Con vs. A $\beta$ + CBD<br>CBD vs. A $\beta$ + CBD<br>A $\beta$ vs. A $\beta$ + CBD                                                                                                                           | $P = 0.001$<br>$P < 0.001$<br>$P < 0.001$<br>$P < 0.001$<br>$P < 0.001$ |
| Fig.8<br>B                  | One-way<br>ANOVA<br>with<br>Tukey's<br><i>post hoc</i> test | 6 | F(3, 20) =<br>42.464   | WT + A $\beta$ vs. WT +<br>A $\beta$ + CBD<br>WT + A $\beta$ vs. siRNA<br>+ A $\beta$<br>WT + A $\beta$ vs. siRNA<br>+ A $\beta$ + CBD<br>WT + A $\beta$ + CBD vs.<br>siRNA + CBD + A $\beta$<br>siRNA + A $\beta$ vs.<br>siRNA + A $\beta$ + CBD | $P < 0.001$<br>$P = 0.033$<br>$P = 0.004$<br>$P = 0.006$<br>$P = 0.003$ |
| Fig.8<br>D                  | One-way<br>ANOVA<br>with<br>Tukey's                         | 4 | F(3, 8) =<br>128.122   | Con vs. CBD<br>Con vs. A $\beta$<br>Con vs. A $\beta$ + CBD<br>CBD vs. A $\beta$ + CBD                                                                                                                                                            | $P = 0.002$<br>$P < 0.001$<br>$P < 0.001$<br>$P = 0.01$                 |

|                              |                                                       |    |                  |                                                                                                                                                                                                                                                                                   |                                                                                                                                     |
|------------------------------|-------------------------------------------------------|----|------------------|-----------------------------------------------------------------------------------------------------------------------------------------------------------------------------------------------------------------------------------------------------------------------------------|-------------------------------------------------------------------------------------------------------------------------------------|
|                              | <i>post hoc</i> test                                  |    |                  | A $\beta$ vs. A $\beta$ + CBD                                                                                                                                                                                                                                                     | $P = 0.031$                                                                                                                         |
| Fig.8E                       | One-way ANOVA with Tukey's <i>post hoc</i> test       | 12 | F(4, 45) = 45.25 | Con vs. CBD<br>Con vs. A $\beta$<br>Con vs. A $\beta$ + CBD<br>Con vs. A $\beta$ + CBD + Rapa<br>A $\beta$ vs. A $\beta$ + CBD<br>A $\beta$ vs. A $\beta$ + CBD + Rapa<br>CBD vs. A $\beta$ + CBD<br>CBD vs. A $\beta$ + CBD + Rapa<br>A $\beta$ + CBD vs. A $\beta$ + CBD + Rapa | $P = 0.01$<br>$P = 0.002$<br>$P = 0.055$<br>$P < 0.001$<br>$P < 0.001$<br>$P < 0.001$<br>$P = 0.963$<br>$P = 0.002$<br>$P < 0.001$  |
| Fig.8F                       | One-way ANOVA with Tukey's <i>post hoc</i> test       | 12 | F(4, 55) = 4.503 | Con vs. CBD<br>Con vs. A $\beta$<br>Con vs. A $\beta$ + CBD<br>Con vs. A $\beta$ + CBD + Rapa<br>A $\beta$ vs. A $\beta$ + CBD<br>A $\beta$ vs. A $\beta$ + CBD + Rapa<br>CBD vs. A $\beta$ + CBD<br>CBD vs. A $\beta$ + CBD + Rapa<br>A $\beta$ + CBD vs. A $\beta$ + CBD + Rapa | $P = 0.564$<br>$P = 0.991$<br>$P = 0.029$<br>$P = 0.012$<br>$P = 0.029$<br>$P = 0.012$<br>$P = 0.045$<br>$P = 0.036$<br>$P = 0.545$ |
| Suppl<br>ement<br>Fig. 1     | Unpaired, two-tailed student's <i>t</i> test analysis | 3  | t(6) = 11.564    | Microglia vs. Neuron                                                                                                                                                                                                                                                              | $P < 0.001$                                                                                                                         |
| Suppl<br>ement<br>Fig.<br>2A | Date from AlzData web server (www.alzdata.org)        | 19 |                  | Con vs. AD                                                                                                                                                                                                                                                                        | $P = 0.312$                                                                                                                         |
| Suppl<br>ement<br>Fig.<br>2B | Date from AlzData web server (www.alzdata.org)        | 19 |                  | EC: Con vs. AD<br>HP: Con vs. AD<br>TC: Con vs. AD<br>FC: Con vs. AD                                                                                                                                                                                                              | $P = 0.058$<br>$P = 0.607$<br>$P = 0.218$<br>$P = 0.347$                                                                            |
| Suppl                        | One-way                                               | 12 | F(4, 56) =       | Con vs. CBD                                                                                                                                                                                                                                                                       | $P = 0.993$                                                                                                                         |

|                              |                                                                   |    |                                            |                                                                                                                                                                                                                |                                                                                                       |
|------------------------------|-------------------------------------------------------------------|----|--------------------------------------------|----------------------------------------------------------------------------------------------------------------------------------------------------------------------------------------------------------------|-------------------------------------------------------------------------------------------------------|
| ement<br>Fig.<br>3A          | ANOVA<br>with<br>Tukey's<br><i>post hoc</i> test                  |    | 10.532                                     | Con vs. A $\beta$<br>Con vs. A $\beta$ + CBD<br>Con vs. A $\beta$ + CBD +<br>Tra<br>CBD vs. A $\beta$ + CBD<br>CBD vs. A $\beta$ + CBD +<br>Tra<br>A $\beta$ + CBD vs. A $\beta$ +<br>CBD + Tra                | $P = 0.001$<br>$P = 0.002$<br>$P = 0.002$<br>$P = 0.039$<br>$P = 0.022$<br>$P = 0.497$                |
| Suppl<br>ement<br>Fig.<br>3B | One-way<br>ANOVA<br>with<br>Tukey's<br><i>post hoc</i> test       | 12 | F(4, 52) =<br>10.532                       | Con vs. CBD<br>Con vs. A $\beta$<br>Con vs. A $\beta$ + CBD<br>Con vs. A $\beta$ + CBD +<br>Tra<br>CBD vs. A $\beta$ + CBD<br>CBD vs. A $\beta$ + CBD +<br>Tra<br>A $\beta$ + CBD vs. A $\beta$ +<br>CBD + Tra | $P = 0.993$<br>$P = 0.001$<br>$P = 0.002$<br>$P = 0.002$<br>$P = 0.039$<br>$P = 0.022$<br>$P = 0.497$ |
| Suppl<br>ement<br>Fig.<br>3B | One-way<br>ANOVA<br>with<br>Tukey's<br><i>post hoc</i> test       | 6  | F(4, 24) =<br>0.628                        | Con vs. Neg +<br>Trem2<br>Con vs. Neg +<br>TRPV2<br>Con vs. siRNA +<br>Trem2<br>Con vs. siRNA +<br>TRPV2                                                                                                       | $P = 1.00$<br>$P = 0.999$<br>$P = 0.968$<br>$P = 0.805$                                               |
| Suppl<br>ement<br>Fig.<br>4A | One-way<br>ANOVA<br>with<br>Tukey's<br><i>post hoc</i> test       | 4  | F(2, 9) =<br>52.467<br>F(2, 9) =<br>38.195 | TRPV2: Con vs. Akti<br>Con vs.<br>PDK1i<br>pAkt: Con vs. Akti<br>Con vs.<br>PDK1i                                                                                                                              | $P = 0.001$<br>$P < 0.001$<br>$P = 0.003$<br>$P < 0.001$                                              |
| Suppl<br>ement<br>Fig.<br>4B | Unpaired,<br>two-tailed<br>student's <i>t</i><br>test<br>analysis | 3  | t (6) = -3.458<br>t(6) = -2.911            | TRPV2: Con vs. IGF<br>pAkt: Con vs. IGF                                                                                                                                                                        | $P = 0.013$<br>$P = 0.027$                                                                            |
| Suppl<br>ement<br>Fig. 5     | One-way<br>ANOVA<br>with<br>Tukey's<br><i>post hoc</i> test       | 4  | F(2, 9) =<br>32.259                        | A $\beta$ vs. CBD<br>A $\beta$ vs. CBD + A $\beta$<br>CBD vs. CBD + A $\beta$                                                                                                                                  | $P = 0.005$<br>$P = 0.013$<br>$P = 0.001$                                                             |



|                              |                                                             |   |                     |                                                                                              |                                                                         |
|------------------------------|-------------------------------------------------------------|---|---------------------|----------------------------------------------------------------------------------------------|-------------------------------------------------------------------------|
| Suppl<br>ement<br>Fig.<br>6A | One-way<br>ANOVA<br>with<br>Tukey's<br><i>post hoc</i> test | 4 | $F(3, 12) = 140.73$ | Con vs. CBD<br>Con vs. A $\beta$<br>Con vs. A $\beta$ + CBD<br>A $\beta$ vs. A $\beta$ + CBD | $P = 0.002$<br>$P = 0.089$<br>$P < 0.001$<br>$P < 0.001$                |
| Suppl<br>ement<br>Fig.<br>6B | One-way<br>ANOVA<br>with<br>Tukey's<br><i>post hoc</i> test | 4 | $F(3, 12) = 0.181$  | Con vs. CBD<br>Con vs. A $\beta$<br>Con vs. A $\beta$ + CBD<br>A $\beta$ vs. A $\beta$ + CBD | $P = 0.946$<br>$P = 0.907$<br>$P = 0.942$<br>$P = 0.999$                |
| Suppl<br>ement<br>Fig.<br>6C | One-way<br>ANOVA<br>with<br>Tukey's<br><i>post hoc</i> test | 4 | $F(3, 12) = 23.484$ | Con vs. CBD<br>Con vs. LPS<br>Con vs. LPS + CBD<br>CBD vs. LPS + CBD<br>LPS vs. LPS + CBD    | $P = 0.037$<br>$P = 0.009$<br>$P < 0.001$<br>$P < 0.001$<br>$P = 0.006$ |
